# Supplementary material
Source: ML conference proceedings conference paper supplement (https://openreview.net/forum?id=PSzDG612AC)
Supplement: supplementary_material [file attachment]

## A TRAINING ALGORITHM

Algorithm 1 summarizes the overall training strategy of our proposed framework. We take the source data  $\{(x_s, y_s)\}$  and CLIP-based segmenter  $G_s$  as the input of our method. After  $N_1$  training iterations for each batch of source data, we obtain the optimized PIN modules. Then we utilize them to generate target features. We use them to fine-tune the target segmenter  $G_t$  within  $N_2$  iterations.

---

### Algorithm 1 Adaptation algorithm

---

**Input:** Source data  $\{(x_s, y_s)\}$ , source segmenter  $G_s$ , Target domain description  $\{\text{TrgDesc}\}$   
**Output:** target segmenters  $\{G_t\}$

- 1: Feed  $\{\text{TrgDesc}\}$  into  $E_{\text{txt}}$  to extract  $\{\text{TrgEmb}\} = E_{\text{txt}}(\{\text{TrgDesc}\})$ ;
- 2: Feed  $\{x_s\}$  into  $E_{\text{img}}$  to extract  $f_s = E_{\text{img}}(\{x_s\})$ ;
- 3: Transform  $f_s$  into  $\{f_{s \rightarrow t}\}$  with PIN modules for each target domain;
- 4: Generate visual meta-nodes  $\mathbf{Q}_v$  with  $\{\mu\}$  and  $\{\sigma\}$  in PIN modules;
- 5: Construct hybrid cross-modality graph  $\mathcal{G}_h$  with  $\mathbf{Q}_v$  and  $\{\text{TrgEmb}\}$ ;
- 6: Calculate the extreme features  $\mathbf{P}_v$  on the boundary of visual feature distribution ranges;
- 7: Mine graph motifs  $\mathcal{M}$  from  $\mathcal{G}_h$ ;
- 8: **for**  $i = 1$  to  $N_1$  **do**
- 9:   Calculate the similarity  $\text{sim}$  of language-vision edges within each motif;
- 10:   Calculate the motif matching loss  $L_{\text{match}}$ ;
- 11:   Calculate the directional loss  $L_{\text{dis}}$ ;
- 12:   Calculate the contrastive loss  $L_{\text{con}}$ ;
- 13:   Update the PIN modules with overall loss  $L_{\text{total}}$ ;
- 14: **end for**
- 15: **for**  $j = 1$  to  $N_2$  **do**
- 16:   Feed  $\{x_s\}$  into  $E_{\text{img}}$  to extract  $f_s = E_{\text{img}}(\{x_s\})$ ;
- 17:   Transform  $f_s$  into  $\{f_{s \rightarrow t}\}$  with trained PIN modules for each target domain;
- 18:   Calculate the cross-entropy loss with  $\{f_{s \rightarrow t}\}$  and source labels  $\{y_s\}$ ;
- 19:   Fine-tune the target segmenters  $\{G_t\}$  for each target domain with  $\{f_{s \rightarrow t}\}$  and  $y_s$
- 20: **end for**
- 21: **return** target segmenters  $\{G_t\}$

---

## B MOTIVATION

The motivation for proposing a new graph motif-based adaptation method stems from the challenges faced in zero-shot domain adaptive semantic segmentation, where the goal is to transfer knowledge from a source domain to a target segmenter without access to target domain data. Existing methods that transform source features to the target domain using language-driven approaches tend to coarsely align language features to global features. This results in the sub-optimal performance of cross-domain feature alignment.

To overcome these issues, the new method focuses on balancing efficiency and effectiveness in feature alignment. It introduces a graph motif structure that is based on domain-wise image feature distributions. By adjusting the angle between language-vision directed edges, the method pulls visual features toward the language feature center, achieving a more precise cross-modality feature alignment without excessive computational demands. Additionally, the incorporation of directional and contrastive losses helps to mitigate the mode-collapse during feature stylization, stabilizing the learning process and enhancing the robustness of the adaptation.

## C LIMITATIONS

Although our work has achieved state-of-the-art performance, it is not without limitations. Firstly, our method is not end-to-end. The segmented training mode complicates the pipeline, potentially restricting its applicability in real-world applications. Additionally, our approach necessitates training a distinct target segmenter for each target domain, thereby constraining its domain generalization capabilities.

Table 6: Comparison of our proposed method with different loss weights.

| $\lambda_{match}$ | $\lambda_{dis}$ | $\lambda_{con}$ | mIoU         |
|-------------------|-----------------|-----------------|--------------|
| 0.01              | 0.01            | 0.01            | 41.13        |
| 0.05              | 0.05            | 0.05            | 41.52        |
| 0.1               | 0.05            | 0.05            | <b>41.80</b> |
| 0.15              | 0.05            | 0.05            | 41.43        |
| 0.05              | 0.1             | 0.05            | 39.73        |
| 0.05              | 0.05            | 0.1             | 40.29        |
| 0.05              | 0.1             | 0.1             | 38.48        |

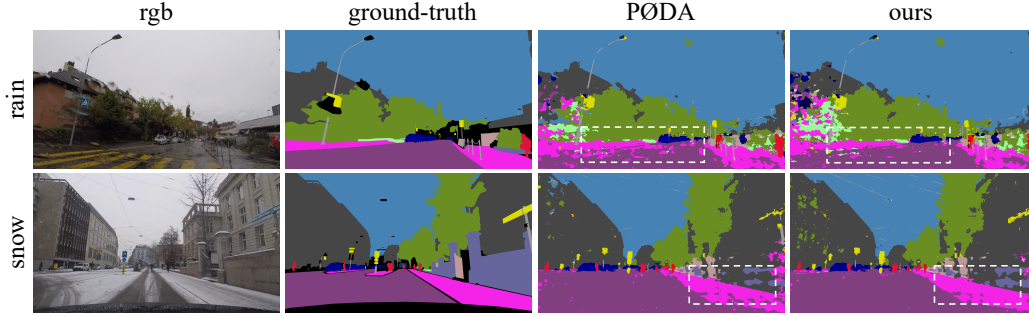

Figure 4: Qualitative comparison results on the task of Cityscapes→ACDC.

## D ABLATION ON THE LOSS WEIGHTS

We evaluate our proposed method with different loss weights  $\lambda_{match}$ ,  $\lambda_{dis}$ , and  $\lambda_{con}$  on the adaptation task of Cityscapes→ACDC. The contribution of different optimization objectives to PIN modules optimization can be balanced by adjusting the loss weights. Notably, relatively large  $\lambda_{dis}$  and  $\lambda_{con}$  are harmful to the adaptation performance, so we need to set them carefully. When  $\lambda_{match}$ ,  $\lambda_{dis}$ , and  $\lambda_{con}$  are set to 0.1, 0.05, and 0.05, our method achieves the best performance. We experimentally determined the weights and applied them to all of our experiments.

## E QUALITATIVE VISUALIZATION RESULTS

Fig. 4 shows more qualitative comparison results on the adaptation task from source to the subsets of ACDC. It shows that our method achieves more accurate pixel-level segmentation results. The segmentation results prove the effectiveness of our method.
